# Supplementary material
Source: publisher site journal article supplement (https://italianbotanist.pensoft.net/article/30560/download/suppl/31/)
Supplement: Supplementary file 1

**Supplementary data (edited by G. Galasso, F. Bartolucci)**

Categories concerning the occurrence status of taxa follow Galasso et al. (2018a).

1. Nomenclature updates

| **Family** | **Nomenclature in Galasso et al. (2018a) and Bartolucci et al. (2018)** | **Revised nomenclature** | **References/Note** |
| --- | --- | --- | --- |
| **Asteraceae** | *Artemisia umbrosa* auct., non (Turcz. ex Besser) Turcz. ex DC. | *Artemisia umbrosa* auct., non (Turcz. ex Besser) Turcz. ex Verl. | Mosyakin et al. (2018); synonym of *Artemisia verlotiorum* Lamotte |
| **Cactaceae** | *Cactus triangularis* (L.) Haw. | *Cereus triangularis* (L.) Haw. | Misprint in Galasso et al. (2018a); synonym of *Selenicereus triangularis* (L.) D.R.Hunt |
| **Brassicaceae** | *Camelina sativa* (L.) Crantz | *Camelina sativa* (L.) Crantz subsp. *sativa* | At least another accepted subspecies exists |
| **Asteraceae** | *Conyza altissima* Naudin & Debeaux ex Debeaux | *Conyza altissima* Naudin & Debeaux | Nesom (2018); synonym of *Erigeron sumatrensis* Retz. |
| **Asteraceae** | *Conyza linifolia* (Willd.) Täckh. | *Conyza linifolia* (Willd.) Täckh., non L., *nom. illeg.* | Nesom (2018); synonym of *Erigeron bonariensis* L. |
| **Pontederiaceae** | *Eichhornia crassipes* (Mart.) Solms | *Pontederia crassipes* Mart. | Pellegrini et al. (2018) |
| **Asteraceae** | *Erigeron ambiguus* (DC.) Sch.Bip. | *Erigeron ambiguus* (DC.) Sch.Bip., non Nutt., *nom. illeg.* | Nesom (2018); synonym of *Erigeron sumatrensis* Retz. (not of *E. bonariensis* L.) |
| **Oleaceae** | *Fontanesia phillyraeoides* Labill. | *Fontanesia phillyreoides* Labill. | According to Art. 60.1 of the ICN (Turland et al. 2018), the spelling of the specific epithet, originally published as “*philliraeoides*”, is to be corrected in “*phillyraeoides*” |
| **Cactaceae** | *Hylocereus triangularis* (L.) Britton & Rose | *Selenicereus triangularis* (L.) D.R.Hunt | Korotkova et al. (2017) |
| **Cactaceae** | *Hylocereus undatus* (Haw.) Britton & Rose | *Selenicereus undatus* (Haw.) D.R.Hunt | Korotkova et al. (2017) |
| **Lamiaceae** | *Marrubium pseudodictamnus* L. subsp. *pseudodictamnus* | *Pseudodictamnus mediterraneus* Salmaki & Siadati subsp. *mediterraneus* | Siadati et al. (2018) |
| **Pontederiaceae** | *Monochoria korsakowii* Regel & Maack | *Pontederia korsakowii* (Regel & Maack) M.Pell. & C.N.Horn | Pellegrini et al. (2018) |
| **Salicaceae** | *Salix* ×*salamonii* (Villevielle) Carrière | *Salix* ×*salamonii* (Carrière) Carrière | Belyaeva et al. (2018); synonym of *Salix* ×*pendulina* Wender. |
| **Salicaceae** | *Salix alba* L. subsp. *vitellina* (L.) Arcang. | *Salix alba* L. subsp. *vitellina* (L.) Arcang., isonym | Priority combination (Belyaeva et al. 2018); synonym of *Salix* ×*fragilis* L. |
| **Salicaceae** | *Salix alba* L. var. *vitellina* (L.) Ser. | *Salix alba* L. var. *vitellina* (L.) Ser., isonym | Priority combination (Belyaeva et al. 2018); synonym of *Salix* ×*fragilis* L. |
| **Salicaceae** | *Salix babylonica* L. var. *salamonii* Villevielle | *Salix babylonica* L. var. *salamonii* Carrière | Synonym of *Salix* ×*pendulina* Wender. |
| **Solanaceae** | *Solanum ottonis* Hyl. | *Solanum ottonis* Hyl., *nom. illeg.* | Särkinen et al. (2018); synonym of *Solanum chenopodioides* Lam. |
| **Poaceae** | *Sporobolus domingensis* Kunth | *Sporobolus domingensis* (Trin.) Kunth | Misprint in Galasso et al. (2018a); this taxon is excluded from Italy |
| **Poaceae** | *Triticum caudatum* (L.) Raspail | *Triticum caudatum* (L.) Raspail subsp. *caudatum* | At least another accepted subspecies exists |
| **Poaceae** | *Triticum peregrinum* Hack. | *Triticum peregrinum* Hack. subsp. *peregrinum* | At least another accepted subspecies exists |

2. Note updates

| **Family** | **Taxon** | **Status/Note update** | **References/Note** |
| --- | --- | --- | --- |
| **Brassicaceae** | *Camelina sativa* (L.) Crantz subsp. *sativa* | Feral of *C. sativa* (L.) Crantz subsp. *sativa*, in turn directly domesticated from *C. sativa* (L.) Crantz. subsp. *microcarpa* (Andrz. ex DC.) Bonnier (E-Turkey) (Zohary and Hopf 2000, Brock et al. 2018). | Zohary and Hopf (2000), Brock et al. (2018) |
| **Iridaceae** | *Crocus sativus* L. | Directly domesticated from *C. cartwrightianus* Herb. (Greece) (Nemati et al. 2018). | Nemati et al. (2018) |
| **Poaceae** | *Hordeum vulgare* L. subsp. *vulgare* | Directly domesticated from *H. vulgare* L. subsp. *spontaneum* (K.Koch) Thell. (SE-Turkey). | Misprint in Galasso et al. (2018a) |
| **Salicaceae** | *Salix* ×*pendulina* Wender. | Parentage: *S. alba* L. × *S. babylonica* L. × *S. euxina* I.V.Belyaeva (Belyaeva et al. 2018). | Belyaeva et al. (2018) |
| **Salicaceae** | *Salix babylonica* L. | Directly domesticated from the same species, *S. babylonica* L. (E-Asia). Most of the records for this species could refer to *S.* ×*pendulina* Wender. | Change derived from the synonymization of *Salix* ×*salamonii* (Carrière) Carrière with *S.* ×*pendulina* Wender. |
| **Solanaceae** | *Solanum physalifolium* Rusby | Confused with *S. nitidibaccatum* Bitter | *Solanum nitidibaccatum* is an accepted name, not a synonym of *Solanum physalifolium* (Särkinen et al. 2018) |

3. Distribution updates

| **Family** | **Taxon** | **Distribution update** | **References/Note** |
| --- | --- | --- | --- |
| **Lythraceae** | *Ammannia baccifera* L. | NP EMR | Misprint in Galasso et al. (2018a) |
| **Lythraceae** | *Ammannia verticillata* (Ard.) Lam. | P A NAT EMR | Misprint in Galasso et al. (2018a) |
| **Apocynaceae** | *Asclepias fruticosa* L. | P A CAS PUG | Fiori (1902); Leigheb and Cameron-Curry (1999) |
| **Brassicaceae** | *Camelina sativa* (L.) Crantz subsp. *sativa* | A NAT FER ITA; D A VDA, P A NAT LOM, P A NAT FVG, P A NAT LIG, P A NAT TOS, P A NAT LAZ, P A NAT ABR, P A NAT SIC | Alien status according to Zohary and Hopf (2000), Brock et al. (2018) |
| **Apiaceae** | *Chaerophyllum aromaticum* L. | A CAS ITA; P A CAS LOM, P A CAS EMR | Native status misprint in Bartolucci et al. (2018) |
| **Oleaceae** | *Chrysojasminum humile* (L.) Banfi | D A TOS | Carta et al. (2018) |
| **Lamiaceae** | *Clerodendrum trichotomum* Thunb. | P A CAS EMR | Ardenghi and Polani (2016) |
| **Asteraceae** | *Cotula australis* (Sieber ex Spreng.) Hook.f. | P A NAT SIC | R. Guarino in Pignatti (2018) |
| **Asteraceae** | *Crepis dioscoridis* L. | P A NAT TOS | Orlandi and Arduini (2010) |
| **Iridaceae** | *Crocus sativus* L. | D A TOS | Carta et al. (2018) |
| **Hydrangeaceae** | *Deutzia crenata* Siebold. & Zucc. | P A CAS FVG | Pignatti (2018) sub *D. scabra* Thunb. |
| **Hydrangeaceae** | *Deutzia gracilis* Siebold & Zucc. | P A CAS FVG | Pignatti (2018) |
| **Hydrangeaceae** | *Deutzia scabra* Thunb. | NP FVG | Pignatti (2018) |
| **Asteraceae** | *Erigeron blakei* Cabrera | NP ITA | The record for Italy (Nesom 2018) is certainly wrong because the cited references do not refer to our country |
| **Oleaceae** | *Fontanesia phillyreoides* Labill. | N NAT ITA; P A NAT SIC | Native status misprint in Bartolucci et al. (2018) |
| **Fabaceae** | *Glycyrrhiza echinata* L. | N NAT ITA | Native status misprint in Bartolucci et al. (2018) |
| **Balsaminaceae** | *Impatiens walleriana* Hook.f. | P A CAS FVG | S. Costalonga in Pignatti (2018) |
| **Solanaceae** | *Lycium barbarum* L. | D A TOS | Carta et al. (2018) |
| **Solanaceae** | *Mandragora officinarum* L. | A CAS ITA; NC A VDA, NC A VEN, NC A MAR, D A UMB | Native status misprint in Bartolucci et al. (2018) |
| **Fabaceae** | *Medicago blancheana* Boiss. | P A CAS TOS | Selvi et al. (2017) |
| **Fabaceae** | *Phaseolus vulgaris* L. subsp. *vulgaris* | D A TOS | Arrigoni (2018) |
| **Crassulaceae** | *Phedimus kamtschaticus* (Fisch. ex Fisch., C.A.Mey. & Avé-Lall.) ’t Hart | N CAS ITA; P A CAS TAA | Gallo et al. (2018) |
| **Urticaceae** | *Pilea microphylla* (L.) Liebm. | N CAS ITA; P A CAS SIC | Scafidi and Raimondo (2018) |
| **Pinaceae** | *Pinus halepensis* Mill. subsp. *brutia* (Ten.) Holmboe | N NAT ITA | Native status misprint in Bartolucci et al. (2018) |
| **Pontederiaceae** | *Pontederia cordata* L. | P A NAT EMR | Montanari et al. (2015) |
| **Rosaceae** | *Rosa chinensis* Jacq. | N D ITA; D A TOS | Carta et al. (2018) |
| **Rosaceae** | *Rosa foetida* Herrm. | P A CAS TOS | Arrigoni (2018) |
| **Rosaceae** | *Rosa moschata* Herrm. | P A CAS TOS | Arrigoni (2018) |
| **Rosaceae** | *Rosa roxburghii* Tratt. | P A CAS TOS | Arrigoni (2018) |
| **Solanaceae** | *Solanum anguivi* Lam. | NP ITA; NP SAR | Confused with *Solanum linnaeanum* Hepper & P.-M.L.Jaeger in Mayoral et al. (2018) |
| **Solanaceae** | *Solanum nitidibaccatum* Bitter | N NAT ITA; P A NAT TAA, P A CAS VEN, P A CAS FVG | This is an accepted name, not a synonym of *Solanum physalifolium* Rusby (Särkinen et al. 2018) |
| **Solanaceae** | *Solanum physalifolium* Rusby | NP ITA; NP TAA, NP VEN, NP FVG | Confused with *Solanum nitidibaccatum* Bitter |
| **Asteraceae** | *Symphyotrichum pilosum* (Willd.) G.L.Nesom | N INV ITA; P A INV LOM | Bona (2015), Galasso (2018) |
| **Boraginaceae** | *Symphytum orientale* L. | P A NAT EMR | Alessandrini et al. (2012) |
| **Talinaceae** | *Talinum paniculatum* (Jacq.) Gaertn. | P A CAS SIC | Scafidi and Raimondo (2017) |
| **Tamaricaceae** | *Tamarix parviflora* DC. | P A NAT PUG | Gargano (2018) |
| **Tamaricaceae** | *Tamarix rosea* Bunge | P A NAT PUG | Gargano (2018) |
| **Cactaceae** | *Trichocereus candicans* (Gillies ex Salm-Dyck) Britton & Rose | N CAS ITA; P A CAS TAA | Gallo et al. (2018) |
| **Liliaceae** | *Tulipa saxatilis* Sieber ex Spreng. | P A CAS LOM | Truzzi (2018) |

4. Synonyms, misapplied or included names

| **Family** | **Synonyms, misapplied or included names** | **Accepted name** | **Note** |
| --- | --- | --- | --- |
| **Urticaceae** | *Adicea microphylla* (L.) Kuntze | *Pilea microphylla* (L.) Liebm. |  |
| **Chenopodiaceae** | *Agathophytum anthelminticum* (L.) Peterm. | *Dysphania anthelmintica* (L.) Mosyakin & Clemants |  |
| **Crassulaceae** | *Aizopsis kamtschatica* (Fisch. ex Fisch., C.A.Mey. & Avé-Lall.) Grulich | *Phedimus kamtschaticus* (Fisch. ex Fisch., C.A.Mey. & Avé-Lall.) ’t Hart |  |
| **Brassicaceae** | *Alyssum sativum* (L.) Scop. | *Camelina sativa* (L.) Crantz subsp. *sativa* |  |
| **Euphorbiaceae** | *Anisophyllum berteroanum* (Balb. ex Spreng.) Klotzsch & Garcke | *Euphorbia berteroana* Balb. ex Spreng. |  |
| **Euphorbiaceae** | *Anisophyllum berteroanum* auct. Fl. Ital., non (Balb. ex Spreng.) Klotzsch & Garcke | *Euphorbia ophthalmica* Pers. |  |
| **Euphorbiaceae** | *Anisophyllum hyssopifolium* auct. Fl. Ital., non (L.) Haw. | *Euphorbia hypericifolia* L. |  |
| **Asteraceae** | *Artemisia vulgaris* L. var. *umbrosa* auct., non Turcz. ex Besser | *Artemisia verlotiorum* Lamotte | Mosyakin et al. (2018) |
| **Solanaceae** | *Bosleria nevadensis* A.Nelson | *Solanum nitidibaccatum* Bitter | Särkinen et al. (2018) |
| **Brassicaceae** | *Camelina glabrata* (DC.) R.M.Fritsch ex N.W.Zinger | *Camelina sativa* (L.) Crantz subsp. *sativa* |  |
| **Brassicaceae** | *Camelina microcarpa* Andrz. ex DC. subsp. *pilosa* (DC.) Jáv. | *Camelina sativa* (L.) Crantz subsp. *sativa* |  |
| **Brassicaceae** | *Camelina microcarpa* Andrz. ex DC. subsp. *pilosa* (DC.) Soó, isonym | *Camelina sativa* (L.) Crantz subsp. *sativa* |  |
| **Brassicaceae** | *Camelina sativa* (L.) Crantz var. *glabrata* DC. | *Camelina sativa* (L.) Crantz subsp. *sativa* |  |
| **Brassicaceae** | *Camelina sylvestris* Wallr. subsp. *pilosa* (DC.) N.W.Zinger | *Camelina sativa* (L.) Crantz subsp. *sativa* |  |
| **Cactaceae** | *Cereus candicans* Gillies ex Salm-Dyck | *Trichocereus candicans* (Gillies ex Salm-Dyck) Britton & Rose |  |
| **Cactaceae** | *Cereus compressus* Mill. | *Selenicereus triangularis* (L.) D.R.Hunt | Korotkova et al. (2017) |
| **Cactaceae** | *Cereus tricostatus* Rol.-Goss. | *Hylocereus undatus* (Haw.) Britton & Rose | Korotkova et al. (2017) |
| **Euphorbiaceae** | *Chamaesyce berteroana* (Balb. ex Spreng.) Millsp. | *Euphorbia berteroana* Balb. ex Spreng. |  |
| **Euphorbiaceae** | *Chamaesyce berteroana* auct. Fl. Ital., non (Balb. ex Spreng.) Millsp. | *Euphorbia ophthalmica* Pers. |  |
| **Euphorbiaceae** | *Chamaesyce hyssopifolia* auct. Fl. Ital., non (L.) Small | *Euphorbia hypericifolia* L. |  |
| **Euphorbiaceae** | *Chamaesyce ophthalmica* (Pers.) D.G.Burch | *Euphorbia ophthalmica* Pers. |  |
| **Talinaceae** | *Claytonia patens* Kuntze, *nom. illeg.* | *Talinum paniculatum* (Jacq.) Gaertn. |  |
| **Ranunculaceae** | *Clematis graveolens* auct., non Lindl. | *Clematis tangutica* (Maxim.) Korsh. |  |
| **Ranunculaceae** | *Clematis orientalis* auct., non L. | *Clematis tangutica* (Maxim.) Korsh. |  |
| **Ranunculaceae** | *Clematis orientalis* L. subsp. *graveolens* auct., non (Lindl.) Kuntze | *Clematis tangutica* (Maxim.) Korsh. |  |
| **Ranunculaceae** | *Clematis orientalis* L. var. *tangutica* Maxim. | *Clematis tangutica* (Maxim.) Korsh. |  |
| **Ranunculaceae** | *Clematis tibetana* Kuntze subsp. *tangutica* (Maxim.) W.A.Brandenburg | *Clematis tangutica* (Maxim.) Korsh. |  |
| **Asteraceae** | *Conyza* ×*daveauana* Sennen | *Erigeron sumatrensis* Retz. | Nesom (2018) |
| **Asteraceae** | *Conyza* ×*flahaultiana* Sennen | *Erigeron sumatrensis* Retz. | Nesom (2018) |
| **Asteraceae** | *Conyza albida* Willd. ex Spreng. | *Erigeron floribundus* (Kunth) Sch.Bip. (not a synonym of *Erigeron sumatrensis* Retz.) | Nesom (2018) |
| **Asteraceae** | *Conyza ambigua* DC. | *Erigeron sumatrensis* Retz. (not a synonym of *E. bonariensis* L.) | Nesom (2018) |
| **Asteraceae** | *Conyza bilbaoana* J.Rémy | *Erigeron floribundus* (Kunth) Sch.Bip. | Nesom (2018) |
| **Asteraceae** | *Conyza blakei* (Cabrera) Cabrera | *Erigeron blakei* Cabrera |  |
| **Asteraceae** | *Conyza bonariensis* (L.) Cronquist f. *subleiotheca* Cuatrec. | *Erigeron sumatrensis* Retz. | Nesom (2018) |
| **Asteraceae** | *Conyza bonariensis* (L.) Cronquist var. *angustifolia* (Cabrera) Cabrera | *Erigeron bonariensis* L. | Nesom (2018) |
| **Asteraceae** | *Conyza bonariensis* (L.) Cronquist var. *leiotheca* (S.F.Blake) Cuatrec. | *Erigeron floribundus* (Kunth) Sch.Bip. | Nesom (2018) |
| **Asteraceae** | *Conyza bonariensis* (L.) Cronquist var. *microcephala* (Cabrera) Cabrera | *Erigeron sumatrensis* Retz. | Nesom (2018) |
| **Asteraceae** | *Conyza crispa* (Porr.) Rupr. | *Erigeron bonariensis* L. | Nesom (2018) |
| **Asteraceae** | *Conyza erigeroides* DC. | *Erigeron sumatrensis* Retz. | Nesom (2018) |
| **Asteraceae** | *Conyza floribunda* Kunth var. *subleiotheca* (Cuatrec.) J.B.Marshall | *Erigeron sumatrensis* Retz. | Nesom (2018) |
| **Asteraceae** | *Conyza groegeri* V.M.Badillo | *Erigeron sumatrensis* Retz. | Nesom (2018) |
| **Asteraceae** | *Conyza rufescens* Hoffmanns. & Link | *Erigeron bonariensis* L. | Nesom (2018) |
| **Asteraceae** | *Conyza sumatrensis* (Retz.) E.Walker var. *leiotheca* (S.F.Blake) Pruski & G.Sancho | *Erigeron floribundus* (Kunth) Sch.Bip. | Nesom (2018) |
| **Asteraceae** | *Coyza gracilis* Hoffmanns. & Link | *Erigeron sumatrensis* Retz. | Nesom (2018) |
| **Urticaceae** | *Dubrueilia microphylla* (L.) Gaudich. | *Pilea microphylla* (L.) Liebm. |  |
| **Cactaceae** | *Echinocereus candicans* (Gillies ex Salm-Dyck.) C.F.Först. | *Trichocereus candicans* (Gillies ex Salm-Dyck) Britton & Rose |  |
| **Cactaceae** | *Echinopsis candicans* (Gillies ex Salm-Dyck) F.A.C.Weber ex D.R.Hunt | *Trichocereus candicans* (Gillies ex Salm-Dyck) Britton & Rose |  |
| **Asteraceae** | *Eclipta alba* (L.) Hassk. var. *neapolitana* N.Terracc. | *Eclipta prostrata* (L.) L. | Motti et al. (2018) |
| **Onagraceae** | *Epilobium paniculatum* Nutt. ex Torr. & A.Gray | *Epilobium brachycarpum* C.Presl |  |
| **Asteraceae** | *Erigeron albidus* (Willd. ex Spreng.) A.Gray | *Erigeron floribundus* (Kunth) Sch.Bip. (not a synonym of *Erigeron sumatrensis* Retz.) | Nesom (2018) |
| **Asteraceae** | *Erigeron bilbaoanus* (J.Rémy) Cabrera | *Erigeron floribundus* (Kunth) Sch.Bip. | Nesom (2018) |
| **Asteraceae** | *Erigeron bonariensis* L. var. *angustifolius* Cabrera | *Erigeron bonariensis* L. | Nesom (2018) |
| **Asteraceae** | *Erigeron bonariensis* L. var. *leiothecus* S.F.Blake | *Erigeron floribundus* (Kunth) Sch.Bip. | Nesom (2018) |
| **Asteraceae** | *Erigeron bonariensis* L. var. *microcephalus* Cabrera | *Erigeron sumatrensis* Retz. | Nesom (2018) |
| **Asteraceae** | *Erigeron crispus* Pourr. subsp. *naudinii* (Bonnet) Bonnier | *Erigeron sumatrensis* Retz. | Nesom (2018) |
| **Asteraceae** | *Erigeron montevidensis* Baker, non Spreng., *nom. illeg.* | *Erigeron blakei* Cabrera |  |
| **Asteraceae** | *Erigeron undulatus* Moench, *nom. illeg.* | *Erigeron bonariensis* L. | Nesom (2018) |
| **Euphorbiaceae** | *Euphorbia berteroana* auct. Fl. Ital., non Balb. ex Spreng. | *Euphorbia ophthalmica* Pers. |  |
| **Euphorbiaceae** | *Euphorbia bicephala* Bertol. | *Euphorbia berteroana* Balb. ex Spreng. |  |
| **Euphorbiaceae** | *Euphorbia hirta* L. var. *ophthalmica* (Pers.) Allem & Irgang | *Euphorbia ophthalmica* Pers. |  |
| **Euphorbiaceae** | *Euphorbia hyssopifolia* auct. Fl. Ital., non L. | *Euphorbia hypericifolia* L. |  |
| **Solanaceae** | *Grabowskia boerhaviifolia* (L.f.) Schltdl. | *Lycium boerhaviifolium* L.f. | Levin et al. (2011) |
| **Solanaceae** | *Grabowskia duplicata* Arn. | *Lycium boerhaviifolium* L.f. | Levin et al. (2011) |
| **Solanaceae** | *Grabowskia megalosperma* Speg. | *Lycium boerhaviifolium* L.f. | Levin et al. (2011) |
| **Solanaceae** | *Grabowskia obtusa* Arn. | *Lycium boerhaviifolium* L.f. | Levin et al. (2011) |
| **Talinaceae** | *Helianthemoides patens* Medik., *nom. illeg.* | *Talinum paniculatum* (Jacq.) Gaertn. |  |
| **Cactaceae** | *Hylocereus compressus* Y.Itô, *nom. inval.* | *Selenicereus triangularis* (L.) D.R.Hunt | Korotkova et al. (2017) |
| **Cactaceae** | *Hylocereus cubensis* Britton & Rose | *Selenicereus triangularis* (L.) D.R.Hunt | Korotkova et al. (2017) |
| **Cactaceae** | *Hylocereus tricostatus* (Rol.-Goss.) Britton & Rose | *Hylocereus undatus* (Haw.) Britton & Rose | Korotkova et al. (2017) |
| **Balsaminaceae** | *Impatiens holstii* Engl. & Warb. | *Impatiens walleriana* Hook.f. |  |
| **Lamiaceae** | *Lycopus lucidus* Turcz. ex Benth. var. *hirtus* Regel | *Lycopus lucidus* Turcz. ex Benth. |  |
| **Oleaceae** | *Mandragora acaulis* Gaertn. | *Mandragora officinarum* L. |  |
| **Oleaceae** | *Mandragora vernalis* Bertol. | *Mandragora officinarum* L. |  |
| **Lamiaceae** | *Marrubium pallidum* Salisb., *nom. illeg.* | *Pseudodictamnus mediterraneus* Salmaki & Siadati subsp. *mediterraneus* | Siadati et al. (2018) |
| **Asteraceae** | *Marsea bonariensis* (L.) V.M.Badillo var. *leiotheca* (S.F.Blake) V.M.Badillo | *Erigeron floribundus* (Kunth) Sch.Bip. | Nesom (2018) |
| **Ranunculaceae** | *Meclatis orientalis* auct., non (L.) Spach | *Clematis tangutica* (Maxim.) Korsh. |  |
| **Pontederiaceae** | *Narukila cordata* (L.) Nieuwl. var. *lancifolia* (Muhl.) Nieuwl. | *Pontederia cordata* L. | Pellegrini et al. (2018) |
| **Chenopodiaceae** | *Neobotrydium ambrosioides* (L.) M.L.Zhang & G.L.Chu | *Dysphania ambrosioides* (L.) Mosyakin & Clemants | Sukhorukov & Kushunina in Sukhorukov et al. (2018) |
| **Chenopodiaceae** | *Neobotrydium pumilio* (R.Br.) M.L.Zhang & G.L.Chu | *Dysphania pumilio* (R.Br.) Mosyakin & Clemants | Sukhorukov & Kushunina in Sukhorukov et al. (2018) |
| **Chenopodiaceae** | *Neobotrydium schraderianum* (Schult.) M.L.Zhang & G.L.Chu | *Dysphania schraderiana* (Schult.) Mosyakin & Clemants | Sukhorukov & Kushunina in Sukhorukov et al. (2018) |
| **Pontederiaceae** | *Pairopus crassipes* (Mart.) Raf. | To be deleted | This combination does not exist |
| **Urticaceae** | *Parietaria microphylla* L. | *Pilea microphylla* (L.) Liebm. |  |
| **Pontederiaceae** | *Piaropus mesomelas* Raf., *nom. illeg.* | *Pontederia crassipes* Mart. | Pellegrini et al. (2018) |
| **Urticaceae** | *Pilea muscosa* Lindl. var. *microphylla* (L.) Wedd. | *Pilea microphylla* (L.) Liebm. |  |
| **Urticaceae** | *Pilea trianthemoides* (Sw.) Lindl. var. *microphylla* (L.) Wedd. | *Pilea microphylla* (L.) Liebm. |  |
| **Pontederiaceae** | *Pontederia cordata* L. var. *lancifolia* (Muhl.) Torr. | *Pontederia cordata* L. | Pellegrini et al. (2018) |
| **Talinaceae** | *Portulaca patens* L., *nom. illeg.* | *Talinum paniculatum* (Jacq.) Gaertn. |  |
| **Rosaceae** | *Rosa bengalensis* Pers. var. *chinensis* (Jacq.) Pers. | *Rosa chinensis* Jacq. |  |
| **Rosaceae** | *Rosa indica* L. p.p., *nom. amb.* | *Rosa chinensis* Jacq. |  |
| **Rosaceae** | *Rosa montezumae* Bertol., non Humb. & Bonpl. ex Thory, *nom. illeg.* | *Rosa chinensis* Jacq. |  |
| **Talinaceae** | *Ruelingia patens* Ehrh., *nom. illeg.* | *Talinum paniculatum* (Jacq.) Gaertn. |  |
| **Salicaceae** | *Salix* ×*fragilis* L. f. *vitellina* (L.) I.V.Belyaeva | *Salix* ×*fragilis* L. |  |
| **Salicaceae** | *Salix* ×*pendulina* Wender. f. *salamonii* (Carrière) I.V.Belyaeva | *Salix* ×*pendulina* Wender. |  |
| **Salicaceae** | *Salix* ×*pendulina* Wender. var. *elegantissima* (K. Koch) Meikle | *Salix* ×*pendulina* Wender. | Belyaeva et al. (2018) |
| **Salicaceae** | *Salix alba* L. × *Salix babylonica* L. | To be deleted |  |
| **Salicaceae** | *Salix alba* L. × *Salix babylonica* L. × *Salix euxina* I.V.Belyaeva | *Salix* ×*pendulina* Wender. | Belyaeva et al. (2018) |
| **Salicaceae** | *Salix alba* L. f. *pendula* C.K.Schneid. | *Salix* ×*pendulina* Wender. | Belyaeva et al. (2018) |
| **Salicaceae** | *Salix alba* L. subsp. *vitellina* (L.) Schübl. & G.Martens | *Salix* ×*fragilis* L. |  |
| **Salicaceae** | *Salix alba* L. var. *tristis* Gaudin, *nom. illeg.* | *Salix* ×*pendulina* Wender. | Belyaeva et al. (2018) |
| **Salicaceae** | *Salix alba* L. var. *tristis* Trautv., *nom. illeg.* | *Salix* ×*pendulina* Wender. | Belyaeva et al. (2018) |
| **Salicaceae** | *Salix alba* L. var. *vitellina* (L.) Stokes | *Salix* ×*fragilis* L. |  |
| **Salicaceae** | *Salix alba* L. var. *vitellina-tristis* Ser. | *Salix* ×*pendulina* Wender. | Belyaeva et al. (2018) |
| **Salicaceae** | *Salix babylonica* L. × *Salix euxina* I.V.Belyaeva | To be deleted |  |
| **Salicaceae** | *Salix elegantissima* K.Koch | *Salix* ×*pendulina* Wender. | Belyaeva et al. (2018) |
| **Crassulaceae** | *Sedum aizoon* L. subsp. *kamtschaticum* (Fisch. ex Fisch., C.A.Mey. & Avé-Lall.) Fröd., isonym | *Phedimus kamtschaticus* (Fisch. ex Fisch., C.A.Mey. & Avé-Lall.) ’t Hart |  |
| **Crassulaceae** | *Sedum aizoon* L. subsp. *kamtschaticum* (Fisch. ex Fisch., C.A.Mey. & Avé-Lall.) Hultén | *Phedimus kamtschaticus* (Fisch. ex Fisch., C.A.Mey. & Avé-Lall.) ’t Hart |  |
| **Crassulaceae** | *Sedum kamtschaticum* Fisch. ex Fisch., C.A.Mey. & Avé-Lall. | *Phedimus kamtschaticus* (Fisch. ex Fisch., C.A.Mey. & Avé-Lall.) ’t Hart |  |
| **Cactaceae** | *Soehrensia candicans* (Gillies ex Salm-Dyck) Schlumpb. | *Trichocereus candicans* (Gillies ex Salm-Dyck) Britton & Rose |  |
| **Solanaceae** | *Solanum americanum* Mill. var. *baylisii* D’Arcy | *Solanum chenopodioides* Lam. | Särkinen et al. (2018) |
| **Solanaceae** | *Solanum besseri* Weinm. | *Solanum chenopodioides* Lam. | Särkinen et al. (2018) |
| **Solanaceae** | *Solanum calophyllum* Phil. | *Solanum triflorum* Nutt. | Särkinen et al. (2018) |
| **Solanaceae** | *Solanum chenopodiifolium* Dunal | *Solanum chenopodioides* Lam. | Särkinen et al. (2018) |
| **Solanaceae** | *Solanum crenatodentatum* Dunal var. *ramosissimum* Dunal | *Solanum chenopodioides* Lam. | Särkinen et al. (2018) |
| **Solanaceae** | *Solanum gaudichaudii* Dunal var. *pyrethrifolium* (Griseb.) Kuntze | *Solanum triflorum* Nutt. | Särkinen et al. (2018) |
| **Solanaceae** | *Solanum gracile* Dunal var. *microphyllum* Dunal | *Solanum chenopodioides* Lam. | Särkinen et al. (2018) |
| **Solanaceae** | *Solanum gracilius* Herter | *Solanum chenopodioides* Lam. | Särkinen et al. (2018) |
| **Solanaceae** | *Solanum isabellei* Dunal | *Solanum chenopodioides* Lam. | Särkinen et al. (2018) |
| **Solanaceae** | *Solanum justischmidtii* E.H.L.Krause | *Solanum sarrachoides* Sendtn. | Särkinen et al. (2018) |
| **Solanaceae** | *Solanum mendocinum* Phil. | *Solanum triflorum* Nutt. | Särkinen et al. (2018) |
| **Solanaceae** | *Solanum nitidibaccatum* Bitter f. *integrifolium* Blom | *Solanum nitidibaccatum* Bitter | Särkinen et al. (2018) |
| **Solanaceae** | *Solanum nodiflorum* Jacq. var. *microphyllum* Hassl. | *Solanum chenopodioides* Lam. | Särkinen et al. (2018) |
| **Solanaceae** | *Solanum patagonicum* C.V.Morton | *Solanum nitidibaccatum* Bitter | Särkinen et al. (2018) |
| **Solanaceae** | *Solanum physalifolium* auct. Fl. Ital., non Rusby | *Solanum nitidibaccatum* Bitter |  |
| **Solanaceae** | *Solanum physalifolium* Rusby var. *nitidibaccatum* (Bitter) Edmonds | *Solanum nitidibaccatum* Bitter | Särkinen et al. (2018) |
| **Solanaceae** | *Solanum ponticum* Prodan | *Solanum triflorum* Nutt. | Särkinen et al. (2018) |
| **Solanaceae** | *Solanum pyrethrifolium* Griseb. | *Solanum triflorum* Nutt. | Särkinen et al. (2018) |
| **Solanaceae** | *Solanum sarachidium* Bitter | *Solanum sarrachoides* Sendtn. | Särkinen et al. (2018) |
| **Solanaceae** | *Solanum sarrachoides* Sendtn. var. *sarachidium* (Bitter) C.V.Morton | *Solanum sarrachoides* Sendtn. | Särkinen et al. (2018) |
| **Solanaceae** | *Solanum styleanum* Dunal | *Solanum nitidibaccatum* Bitter | Särkinen et al. (2018) |
| **Solanaceae** | *Solanum subspatulatum* Sendtn. | *Solanum chenopodioides* Lam. | Särkinen et al. (2018) |
| **Solanaceae** | *Solanum triflorum* Nutt. f. *malvinum* De Langhe & D’hose | *Solanum triflorum* Nutt. | Särkinen et al. (2018) |
| **Solanaceae** | *Solanum triflorum* Nutt. var. *calophyllum* (Phil.) Bitter | *Solanum triflorum* Nutt. | Särkinen et al. (2018) |
| **Solanaceae** | *Solanum triflorum* Nutt. var. *dentatum* Ooststr. | *Solanum triflorum* Nutt. | Särkinen et al. (2018) |
| **Solanaceae** | *Solanum triflorum* Nutt. var. *majus* Hook. | *Solanum triflorum* Nutt. | Särkinen et al. (2018) |
| **Solanaceae** | *Solanum triflorum* Nutt. var. *minus* Hook. | *Solanum triflorum* Nutt. | Särkinen et al. (2018) |
| **Solanaceae** | *Solanum triflorum* Nutt. var. *ponticum* (Prodan) Borza | *Solanum triflorum* Nutt. | Särkinen et al. (2018) |
| **Solanaceae** | *Solanum triflorum* Nutt. var. *pyrethrifolium* (Griseb.) Bitter ex Probst | *Solanum triflorum* Nutt. | Särkinen et al. (2018) |
| **Solanaceae** | *Solanum vile* Bitter | *Solanum chenopodioides* Lam. | Särkinen et al. (2018) |
| **Poaceae** | *Sporobolus domingensis* auct. Fl. Ital., non (Trin.) Kunth | *Sporobolus cryptandrus* (Torr.) A.Gray |  |
| **Poaceae** | *Stipa hyalina* Nees | Synonym only of *Nassella hyalina* (Nees) Barkworth | Misprint in Galasso et al. (2018a) |
| **Poaceae** | *Stipa tenuissima* Trin. | *Nassella tenuissima* (Trin.) Barkworth |  |
| **Talinaceae** | *Talinum patens* Willd., *nom. illeg.* | *Talinum paniculatum* (Jacq.) Gaertn. |  |
| **Commelinaceae** | *Tradescantia albovittata* Pynaert | *Tradescantia fluminensis* Vell. | Pellegrini (2018) |
| **Commelinaceae** | *Tradescantia crassula* Link & Otto var. *gaudichaudii* C.B.Clarke | *Tradescantia cerinthoides* Kunth | Pellegrini (2018) |
| **Commelinaceae** | *Tradescantia cymbispatha* C.B.Clarke var. *villosissima* C.B.Clarke | *Tradescantia cerinthoides* Kunth | Pellegrini (2018) |
| **Commelinaceae** | *Tradescantia fluminensis* Vell. f. *albovittata* (Pynaert) Voss | *Tradescantia fluminensis* Vell. | Pellegrini (2018) |
| **Commelinaceae** | *Tradescantia fluminensis* Vell. f. *aureovittata* Voss | *Tradescantia fluminensis* Vell. | Pellegrini (2018) |
| **Commelinaceae** | *Tradescantia koernickeana* Seub. | *Tradescantia cerinthoides* Kunth | Pellegrini (2018) |
| **Commelinaceae** | *Tradescantia laekenensis* L.H.Bailey & E.Z.Bailey, *nom. nud.* | *Tradescantia fluminensis* Vell. | Pellegrini (2018) |
| **Commelinaceae** | *Tradescantia striata* L.H.Bailey & E.Z.Bailey, *nom. nud.* | *Tradescantia fluminensis* Vell. | Pellegrini (2018) |
| **Liliaceae** | *Tulipa bakeri* A.D.Hall | *Tulipa saxatilis* Sieber ex Spreng. |  |
| **Liliaceae** | *Tulipa beccariana* Bicchi | *Tulipa saxatilis* Sieber ex Spreng. |  |
| **Liliaceae** | *Tulipa chrysobasis* Coustur. & Gand. | *Tulipa saxatilis* Sieber ex Spreng. |  |
| **Liliaceae** | *Tulipa saxatilis* Sieber ex Spreng. subsp. *bakeri* (A.D.Hall) Zonn. | *Tulipa saxatilis* Sieber ex Spreng. |  |
| **Pontederiaceae** | *Unisema cordata* (L.) Farw. f. *lancifolia* (Muhl.) Farw. | *Pontederia cordata* L. | Pellegrini et al. (2018) |
| **Urticaceae** | *Urtica microphylla* (L.) Sw. | *Pilea microphylla* (L.) Liebm. |  |
| **Ranunculaceae** | *Viticella orientalis* auct., non (L.) W.A.Weber | *Clematis tangutica* (Maxim.) Korsh. |  |
| **Solanaceae** | *Witheringia chenopodioides* (Lam.) J.Rémy | *Solanum chenopodioides* Lam. | Särkinen et al. (2018) |
